# Supplementary material for: The synergistic effects of stimuli-responsive polymers with nano- structured surfaces: wettability and protein adsorption
Source: Royal Society of Chemistry journal article supplement (doi:10.1039/c1ra00201e), 2011-01-01
Supplement: c1ra00201e.pdf [file c1ra00201e.pdf]

*The synergistic effects of stimuli-responsive polymers with nano-structured surfaces:  
wettability and protein adsorption*

Qian Yu, Xin Li, Yanxia Zhang, Lin Yuan\*, Tieliang Zhao, and Hong Chen\*

**1. Preparation of silicon nanowire arrays**

The silicon nanowire arrays (SiNWAs) were prepared by chemical etching of crystalline silicon in HF/AgNO<sub>3</sub> aqueous solution. Briefly, silicon wafers were cleaned in a freshly prepared piranha solution (H<sub>2</sub>SO<sub>4</sub>:H<sub>2</sub>O<sub>2</sub>=7:3(v/v) **Caution: piranha solution reacts violently with organic materials and should be handled carefully!**) at 90°C for 2 h and were then rinsed with distilled water and dried in a stream of argon. The cleaned silicon wafers were immersed in the etching solution containing 5.0 mol·L<sup>-1</sup> HF and 0.015 mol·L<sup>-1</sup> AgNO<sub>3</sub> at 50°C for 10 min, 30 min and 50 min. The resulting surfaces were immersed in 20% nitric acid for 1 min and then rinsed copiously with deionized water.

**2. Optimizing reaction condition for preparation of homogeneous SiNWAs**

The morphologies of SiNWAs prepared under different etching times were shown in **Figure S1**. By comparison of morphology and size of these samples, we choose 30 min as the optimized reaction time to prepare SiNWAs for the further polymer modification.

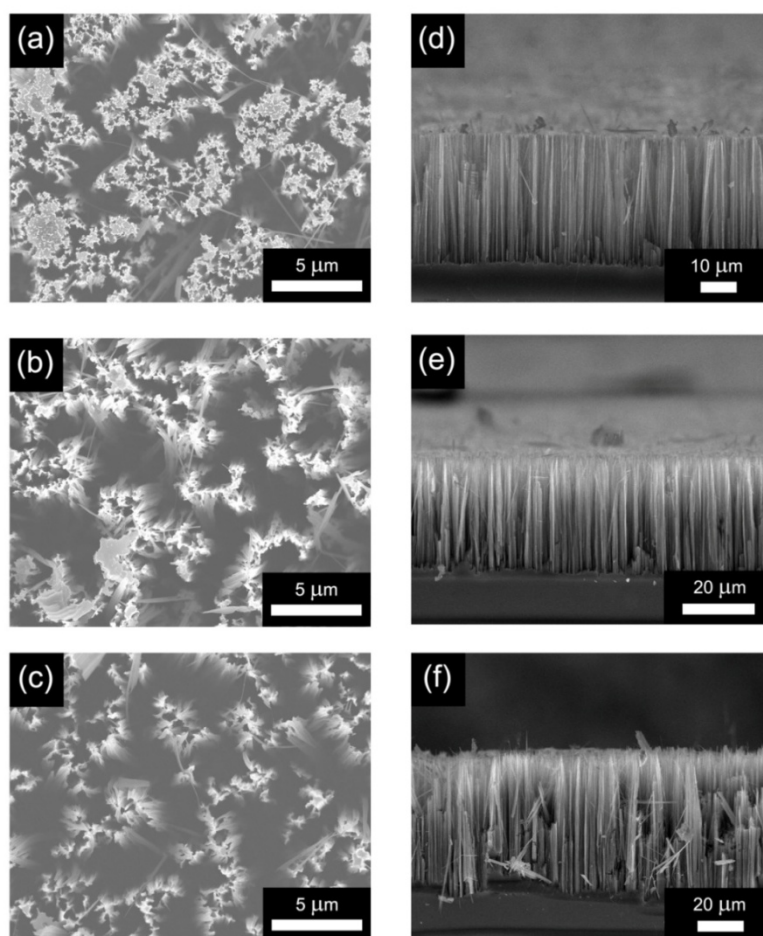

**Figure S1** Top view (left) and cross-sectional view (right) of the as-prepared SiNWAs under different etching times. (a) and (d): 10 min; (b) and (e): 30 min; (c) and (f): 60 min.

## Electronic Supplementary Information

### 3. Contact angle measurement on SiNWAs-poly(MAA) surfaces

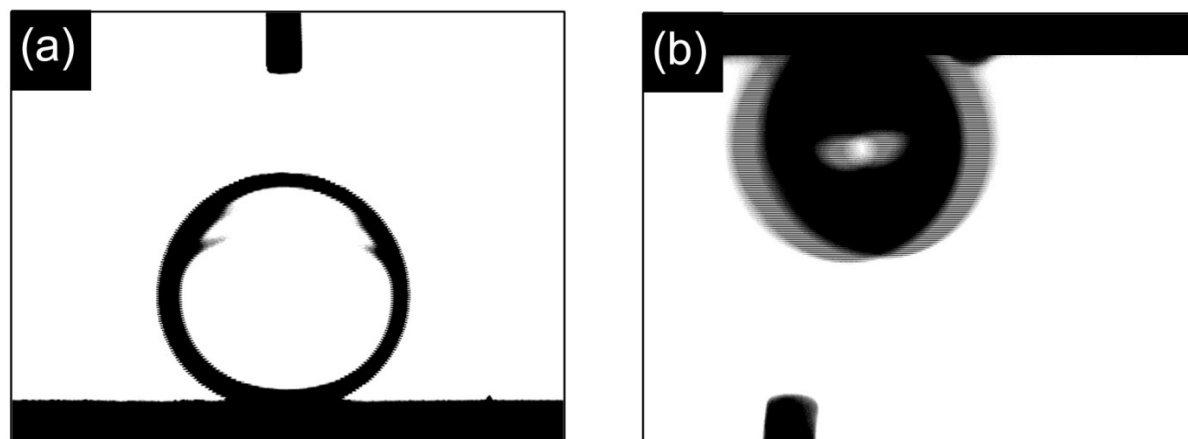

**Figure S2.** Contact angle images of (a) oil ( $\text{CH}_2\text{Cl}_2$ ) drop and (b) air bubble on SiNWAs-poly(MAA) surfaces in PBS. The contact angles are independent of pH.

### 4. Protein adsorption on SiNWAs-poly(NIPAAm) surfaces

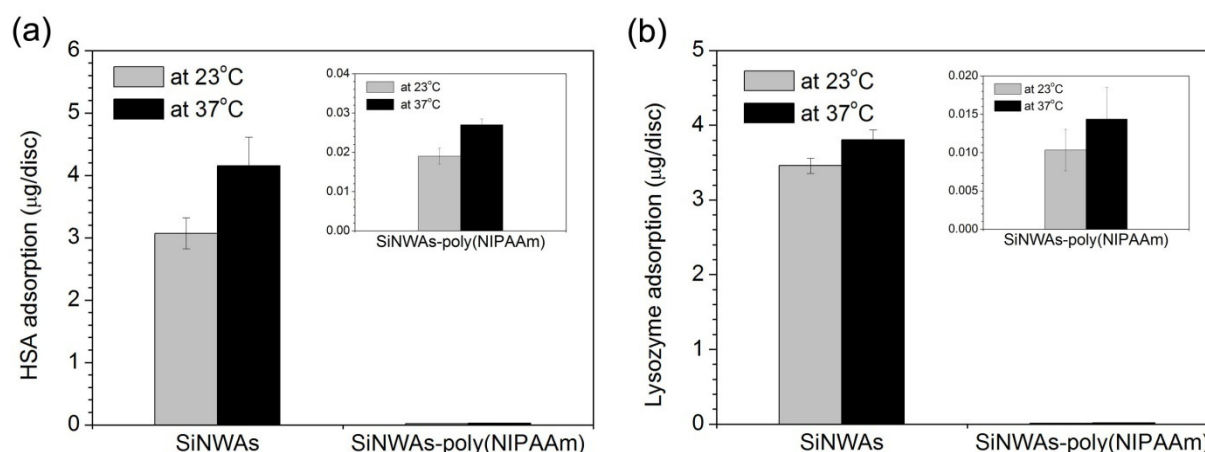

**Figure S3.** Adsorption of 1mg/mL (a) HSA and (b) lysozyme from PBS solution over a 3-h period on pristine and poly(NIPAAm) modified SiNWAs surfaces at 23 and 37°C. The “apparent” surface area of one disc is 0.5 cm<sup>2</sup>. Data consist of the mean ± standard error (n=3).
